# Supplementary material
Source: publisher figshare collection journal article supplement (https://acs.figshare.com/ndownloader/files/4577413)
Supplement: Supplementary file 1 [file 4577413]

  
data_1 
  
_audit_creation_method            SHELXL-97 
_chemical_name_systematic 
; 
 ? 
; 
_chemical_name_common             ? 
_chemical_melting_point           ? 
_chemical_formula_moiety          
 'C60 H44 Ag S4 Si, 3(C6 H6), B F4' 
_chemical_formula_sum 
 'C78 H62 Ag B F4 S4 Si' 
_chemical_formula_weight          1350.29 
  
loop_ 
 _atom_type_symbol 
 _atom_type_description 
 _atom_type_scat_dispersion_real 
 _atom_type_scat_dispersion_imag 
 _atom_type_scat_source 
 'C'  'C'   0.0033   0.0016 
 'International Tables Vol C Tables 4.2.6.8 and 6.1.1.4' 
 'H'  'H'   0.0000   0.0000 
 'International Tables Vol C Tables 4.2.6.8 and 6.1.1.4' 
 'Si'  'Si'   0.0817   0.0704 
 'International Tables Vol C Tables 4.2.6.8 and 6.1.1.4' 
 'S'  'S'   0.1246   0.1234 
 'International Tables Vol C Tables 4.2.6.8 and 6.1.1.4' 
 'B'  'B'   0.0013   0.0007 
 'International Tables Vol C Tables 4.2.6.8 and 6.1.1.4' 
 'Ag'  'Ag'  -0.8971   1.1015 
 'International Tables Vol C Tables 4.2.6.8 and 6.1.1.4' 
 'F'  'F'   0.0171   0.0103 
 'International Tables Vol C Tables 4.2.6.8 and 6.1.1.4' 
  
_symmetry_cell_setting            Orthorhombic 
_symmetry_space_group_name_H-M    Pbca 
  
loop_ 
 _symmetry_equiv_pos_as_xyz 
 'x, y, z' 
 '-x+1/2, -y, z+1/2' 
 '-x, y+1/2, -z+1/2' 
 'x+1/2, -y+1/2, -z' 
 '-x, -y, -z' 
 'x-1/2, y, -z-1/2' 
 'x, -y-1/2, z-1/2' 
 '-x-1/2, y-1/2, z' 
  
_cell_length_a                    17.6591(17) 
_cell_length_b                    17.6477(17) 
_cell_length_c                    42.628(4) 
_cell_angle_alpha                 90.00 
_cell_angle_beta                  90.00 
_cell_angle_gamma                 90.00 
_cell_volume                      13285(2) 
_cell_formula_units_Z             8 
_cell_measurement_temperature     100(2) 
_cell_measurement_reflns_used     7653 
_cell_measurement_theta_min       2.17 
_cell_measurement_theta_max       30.05 
  
_exptl_crystal_description        plate 
_exptl_crystal_colour             yellow 
_exptl_crystal_size_max           0.55 
_exptl_crystal_size_mid           0.43 
_exptl_crystal_size_min           0.14 
_exptl_crystal_density_meas       ? 
_exptl_crystal_density_diffrn     1.350 
_exptl_crystal_density_method     'not measured' 
_exptl_crystal_F_000              5568 
_exptl_absorpt_coefficient_mu     0.503 
_exptl_absorpt_correction_type    'multi-scan'
_exptl_absorpt_correction_T_min   0.789
_exptl_absorpt_correction_T_max   0.932
_exptl_absorpt_process_details    'SADABS in SAINT+ (Bruker, 2003)'
  
_exptl_special_details 
; 
 ? 
; 
  
_diffrn_ambient_temperature       100(2) 
_diffrn_radiation_wavelength      0.71073 
_diffrn_radiation_type            MoK\a 
_diffrn_radiation_source          'fine-focus sealed tube' 
_diffrn_radiation_monochromator   graphite 
_diffrn_measurement_device_type   'Bruker AXS SMART APEX CCD diffractometer'  
_diffrn_measurement_method        '\w scans' 
_diffrn_detector_area_resol_mean  ? 
_diffrn_standards_number          0 
_diffrn_standards_interval_count  ? 
_diffrn_standards_interval_time   ? 
_diffrn_standards_decay_%         ?
_diffrn_reflns_number             134589 
_diffrn_reflns_av_R_equivalents   0.0627 
_diffrn_reflns_av_sigmaI/netI     0.0359 
_diffrn_reflns_limit_h_min        -23 
_diffrn_reflns_limit_h_max        23 
_diffrn_reflns_limit_k_min        -23 
_diffrn_reflns_limit_k_max        23 
_diffrn_reflns_limit_l_min        -56 
_diffrn_reflns_limit_l_max        55 
_diffrn_reflns_theta_min          0.96 
_diffrn_reflns_theta_max          28.28 
_reflns_number_total              16502 
_reflns_number_gt                 11402 
_reflns_threshold_expression      I>2\s(I) 
  
_computing_data_collection        'SMART 5.630 (Bruker, 1997-2002)' 
_computing_cell_refinement        'SAINT+ 6.45 (Bruker, 2003)' 
_computing_data_reduction         'SAINT+ 6.45' 
_computing_structure_solution     'SHELXTL 6.14 (Bruker, 2000-2003)' 
_computing_structure_refinement   'SHELXTL 6.14' 
_computing_molecular_graphics     'SHELXTL 6.14' 
_computing_publication_material   'SHELXTL 6.14' 
  
_refine_special_details 
; 
 Refinement of F^2^ against ALL reflections.  The weighted R-factor wR and 
 goodness of fit S are based on F^2^, conventional R-factors R are based 
 on F, with F set to zero for negative F^2^. The threshold expression of 
 F^2^ > 2sigma(F^2^) is used only for calculating R-factors(gt) etc. and is 
 not relevant to the choice of reflections for refinement.  R-factors based 
 on F^2^ are statistically about twice as large as those based on F, and R- 
 factors based on ALL data will be even larger. 
; 
  
_refine_ls_structure_factor_coef  Fsqd 
_refine_ls_matrix_type            full 
_refine_ls_weighting_scheme       calc 
_refine_ls_weighting_details 
 'calc w=1/[\s^2^(Fo^2^)+(0.1234P)^2^+17.9514P] where P=(Fo^2^+2Fc^2^)/3' 
_atom_sites_solution_primary      direct 
_atom_sites_solution_secondary    difmap 
_atom_sites_solution_hydrogens    geom 
_refine_ls_hydrogen_treatment     constr 
_refine_ls_extinction_method      none 
_refine_ls_extinction_coef        ? 
_refine_ls_number_reflns          16502 
_refine_ls_number_parameters      806 
_refine_ls_number_restraints      0 
_refine_ls_R_factor_all           0.1044 
_refine_ls_R_factor_gt            0.0725 
_refine_ls_wR_factor_ref          0.2222 
_refine_ls_wR_factor_gt           0.1913 
_refine_ls_goodness_of_fit_ref    1.042 
_refine_ls_restrained_S_all       1.042 
_refine_ls_shift/su_max           0.001 
_refine_ls_shift/su_mean          0.000 
  
loop_ 
 _atom_site_label 
 _atom_site_type_symbol 
 _atom_site_fract_x 
 _atom_site_fract_y 
 _atom_site_fract_z 
 _atom_site_U_iso_or_equiv 
 _atom_site_adp_type 
 _atom_site_occupancy 
 _atom_site_symmetry_multiplicity 
 _atom_site_calc_flag 
 _atom_site_refinement_flags 
 _atom_site_disorder_assembly 
 _atom_site_disorder_group 
Ag1 Ag 1.01980(2) 0.26184(2) 0.740946(7) 0.04257(12) Uani 1 1 d . . . 
B1 B 0.7501(3) 0.4951(4) 0.73739(14) 0.0550(14) Uani 1 1 d . . . 
C1 C 0.6207(2) 0.2178(2) 0.51469(8) 0.0337(8) Uani 1 1 d . . . 
C2 C 0.6174(2) 0.1592(2) 0.53654(10) 0.0430(9) Uani 1 1 d . . . 
H2 H 0.5741 0.1273 0.5371 0.052 Uiso 1 1 calc R . . 
C3 C 0.6756(2) 0.1464(2) 0.55734(10) 0.0432(9) Uani 1 1 d . . . 
H3 H 0.6721 0.1055 0.5717 0.052 Uiso 1 1 calc R . . 
C4 C 0.7394(2) 0.1924(2) 0.55765(9) 0.0387(9) Uani 1 1 d . . . 
C5 C 0.7436(3) 0.2514(3) 0.53606(11) 0.0490(11) Uani 1 1 d . . . 
H5 H 0.7870 0.2832 0.5357 0.059 Uiso 1 1 calc R . . 
C6 C 0.6844(3) 0.2642(3) 0.51483(10) 0.0447(10) Uani 1 1 d . . . 
H6 H 0.6877 0.3050 0.5004 0.054 Uiso 1 1 calc R . . 
C7 C 0.7967(2) 0.1826(3) 0.58130(10) 0.0425(9) Uani 1 1 d . . . 
C8 C 0.8395(2) 0.1770(2) 0.60272(10) 0.0427(9) Uani 1 1 d . . . 
C9 C 0.8899(2) 0.1699(2) 0.62907(9) 0.0391(9) Uani 1 1 d . . . 
C10 C 0.8615(3) 0.1462(3) 0.65825(10) 0.0466(10) Uani 1 1 d . . . 
H10 H 0.8088 0.1372 0.6607 0.056 Uiso 1 1 calc R . . 
C11 C 0.9100(3) 0.1358(3) 0.68333(10) 0.0460(10) Uani 1 1 d . . . 
H11 H 0.8904 0.1196 0.7030 0.055 Uiso 1 1 calc R . . 
C12 C 0.9866(2) 0.1488(2) 0.68008(9) 0.0389(9) Uani 1 1 d . . . 
C13 C 1.0149(2) 0.1731(3) 0.65157(10) 0.0427(9) Uani 1 1 d . . . 
H13 H 1.0676 0.1823 0.6493 0.051 Uiso 1 1 calc R . . 
C14 C 0.9670(2) 0.1840(3) 0.62623(10) 0.0428(9) Uani 1 1 d . . . 
H14 H 0.9870 0.2013 0.6068 0.051 Uiso 1 1 calc R . . 
C15 C 1.0105(3) 0.0639(3) 0.73550(14) 0.0656(14) Uani 1 1 d . . . 
H15A H 0.9612 0.0810 0.7434 0.098 Uiso 1 1 calc R . . 
H15B H 1.0441 0.0529 0.7532 0.098 Uiso 1 1 calc R . . 
H15C H 1.0036 0.0180 0.7229 0.098 Uiso 1 1 calc R . . 
C16 C 0.4570(2) 0.2657(2) 0.51778(9) 0.0356(8) Uani 1 1 d . . . 
C17 C 0.3946(3) 0.2175(3) 0.52173(11) 0.0525(11) Uani 1 1 d . . . 
H17 H 0.3912 0.1727 0.5095 0.063 Uiso 1 1 calc R . . 
C18 C 0.3379(3) 0.2340(3) 0.54310(11) 0.0596(13) Uani 1 1 d . . . 
H18 H 0.2963 0.2004 0.5454 0.071 Uiso 1 1 calc R . . 
C19 C 0.3414(2) 0.2994(3) 0.56118(9) 0.0471(11) Uani 1 1 d . . . 
C20 C 0.4037(3) 0.3469(3) 0.55779(10) 0.0483(11) Uani 1 1 d . . . 
H20 H 0.4075 0.3915 0.5702 0.058 Uiso 1 1 calc R . . 
C21 C 0.4603(3) 0.3296(3) 0.53640(10) 0.0450(10) Uani 1 1 d . . . 
H21 H 0.5025 0.3627 0.5345 0.054 Uiso 1 1 calc R . . 
C22 C 0.2834(3) 0.3159(3) 0.58391(10) 0.0537(12) Uani 1 1 d . . . 
C23 C 0.2363(2) 0.3278(3) 0.60317(10) 0.0519(12) Uani 1 1 d . . . 
C24 C 0.1797(2) 0.3401(3) 0.62717(9) 0.0457(10) Uani 1 1 d . . . 
C25 C 0.1047(2) 0.3503(3) 0.61948(9) 0.0426(9) Uani 1 1 d . . . 
H25 H 0.0897 0.3503 0.5981 0.051 Uiso 1 1 calc R . . 
C26 C 0.0509(2) 0.3606(3) 0.64274(9) 0.0438(10) Uani 1 1 d . . . 
H26 H -0.0008 0.3672 0.6372 0.053 Uiso 1 1 calc R . . 
C27 C 0.0721(2) 0.3613(2) 0.67401(9) 0.0369(8) Uani 1 1 d . . . 
C28 C 0.1466(3) 0.3508(3) 0.68193(10) 0.0572(13) Uani 1 1 d . . . 
H28 H 0.1612 0.3507 0.7034 0.069 Uiso 1 1 calc R . . 
C29 C 0.2005(3) 0.3403(4) 0.65881(10) 0.0684(17) Uani 1 1 d . . . 
H29 H 0.2521 0.3333 0.6645 0.082 Uiso 1 1 calc R . . 
C30 C -0.0833(3) 0.3680(4) 0.68584(14) 0.0731(16) Uani 1 1 d . . . 
H30A H -0.0877 0.4061 0.6692 0.110 Uiso 1 1 calc R . . 
H30B H -0.1238 0.3756 0.7012 0.110 Uiso 1 1 calc R . . 
H30C H -0.0877 0.3172 0.6767 0.110 Uiso 1 1 calc R . . 
C31 C 0.5039(2) 0.1594(2) 0.46480(9) 0.0338(8) Uani 1 1 d . . . 
C32 C 0.5346(2) 0.0859(2) 0.46507(10) 0.0422(9) Uani 1 1 d . . . 
H32 H 0.5726 0.0733 0.4800 0.051 Uiso 1 1 calc R . . 
C33 C 0.5102(3) 0.0314(3) 0.44381(10) 0.0449(10) Uani 1 1 d . . . 
H33 H 0.5316 -0.0180 0.4444 0.054 Uiso 1 1 calc R . . 
C34 C 0.4549(2) 0.0484(2) 0.42178(9) 0.0401(9) Uani 1 1 d . . . 
C35 C 0.4224(2) 0.1205(2) 0.42166(9) 0.0395(9) Uani 1 1 d . . . 
H35 H 0.3834 0.1323 0.4071 0.047 Uiso 1 1 calc R . . 
C36 C 0.4473(2) 0.1747(2) 0.44284(9) 0.0362(8) Uani 1 1 d . . . 
H36 H 0.4251 0.2237 0.4424 0.043 Uiso 1 1 calc R . . 
C37 C 0.4324(3) -0.0064(3) 0.39841(10) 0.0453(10) Uani 1 1 d . . . 
C38 C 0.4156(3) -0.0517(3) 0.37867(10) 0.0472(10) Uani 1 1 d . . . 
C39 C 0.4006(3) -0.1090(2) 0.35554(9) 0.0438(10) Uani 1 1 d . . . 
C40 C 0.4152(3) -0.1843(3) 0.36252(10) 0.0492(11) Uani 1 1 d . . . 
H40 H 0.4316 -0.1976 0.3830 0.059 Uiso 1 1 calc R . . 
C41 C 0.4061(3) -0.2410(3) 0.33995(10) 0.0450(10) Uani 1 1 d . . . 
H41 H 0.4159 -0.2925 0.3451 0.054 Uiso 1 1 calc R . . 
C42 C 0.3829(2) -0.2215(2) 0.31029(9) 0.0390(9) Uani 1 1 d . . . 
C43 C 0.3632(3) -0.1473(3) 0.30343(10) 0.0499(11) Uani 1 1 d . . . 
H43 H 0.3437 -0.1347 0.2833 0.060 Uiso 1 1 calc R . . 
C44 C 0.3722(3) -0.0913(3) 0.32614(10) 0.0523(11) Uani 1 1 d . . . 
H44 H 0.3587 -0.0404 0.3214 0.063 Uiso 1 1 calc R . . 
C45 C 0.3991(3) -0.3783(3) 0.29703(12) 0.0571(12) Uani 1 1 d . . . 
H45A H 0.4509 -0.3746 0.3051 0.086 Uiso 1 1 calc R . . 
H45B H 0.3967 -0.4183 0.2811 0.086 Uiso 1 1 calc R . . 
H45C H 0.3645 -0.3907 0.3143 0.086 Uiso 1 1 calc R . . 
C46 C 0.5560(2) 0.3201(2) 0.46241(8) 0.0326(7) Uani 1 1 d . . . 
C47 C 0.6153(2) 0.3130(2) 0.44095(9) 0.0347(8) Uani 1 1 d . . . 
H47 H 0.6477 0.2702 0.4423 0.042 Uiso 1 1 calc R . . 
C48 C 0.6283(2) 0.3659(2) 0.41788(9) 0.0377(8) Uani 1 1 d . . . 
H48 H 0.6694 0.3593 0.4037 0.045 Uiso 1 1 calc R . . 
C49 C 0.5813(2) 0.4291(2) 0.41520(9) 0.0379(8) Uani 1 1 d . . . 
C50 C 0.5215(2) 0.4376(2) 0.43654(10) 0.0427(9) Uani 1 1 d . . . 
H50 H 0.4893 0.4806 0.4352 0.051 Uiso 1 1 calc R . . 
C51 C 0.5092(2) 0.3837(2) 0.45939(10) 0.0413(9) Uani 1 1 d . . . 
H51 H 0.4679 0.3899 0.4734 0.050 Uiso 1 1 calc R . . 
C52 C 0.5919(2) 0.4840(2) 0.39059(9) 0.0411(9) Uani 1 1 d . . . 
C53 C 0.5973(2) 0.5293(2) 0.36986(9) 0.0403(9) Uani 1 1 d . . . 
C54 C 0.6011(2) 0.5853(2) 0.34556(9) 0.0394(9) Uani 1 1 d . . . 
C55 C 0.6216(2) 0.5661(2) 0.31497(9) 0.0422(9) Uani 1 1 d . . . 
H55 H 0.6346 0.5152 0.3101 0.051 Uiso 1 1 calc R . . 
C56 C 0.6233(2) 0.6207(3) 0.29170(9) 0.0428(9) Uani 1 1 d . . . 
H56 H 0.6368 0.6070 0.2709 0.051 Uiso 1 1 calc R . . 
C57 C 0.6053(2) 0.6957(2) 0.29859(9) 0.0369(8) Uani 1 1 d . . . 
C58 C 0.5868(2) 0.7158(3) 0.32904(10) 0.0424(9) Uani 1 1 d . . . 
H58 H 0.5761 0.7673 0.3339 0.051 Uiso 1 1 calc R . . 
C59 C 0.5837(2) 0.6619(3) 0.35230(10) 0.0438(10) Uani 1 1 d . . . 
H59 H 0.5698 0.6761 0.3730 0.053 Uiso 1 1 calc R . . 
C60 C 0.6909(3) 0.7520(4) 0.24816(17) 0.081(2) Uani 1 1 d . . . 
H60A H 0.7339 0.7520 0.2627 0.122 Uiso 1 1 calc R . . 
H60B H 0.6977 0.7924 0.2326 0.122 Uiso 1 1 calc R . . 
H60C H 0.6883 0.7030 0.2374 0.122 Uiso 1 1 calc R . . 
C61 C 0.6656(4) 0.5009(4) 0.49751(19) 0.091(2) Uani 1 1 d . . . 
H61 H 0.6147 0.5127 0.4923 0.109 Uiso 1 1 calc R . . 
C62 C 0.7193(4) 0.4950(4) 0.47403(16) 0.0775(17) Uani 1 1 d . . . 
H62 H 0.7066 0.5064 0.4529 0.093 Uiso 1 1 calc R . . 
C63 C 0.7894(3) 0.4728(3) 0.48162(14) 0.0634(13) Uani 1 1 d . . . 
H63 H 0.8262 0.4654 0.4656 0.076 Uiso 1 1 calc R . . 
C64 C 0.8085(3) 0.4608(3) 0.51245(14) 0.0657(14) Uani 1 1 d . . . 
H64 H 0.8590 0.4471 0.5176 0.079 Uiso 1 1 calc R . . 
C65 C 0.7573(4) 0.4681(3) 0.53541(15) 0.0696(15) Uani 1 1 d . . . 
H65 H 0.7708 0.4582 0.5566 0.084 Uiso 1 1 calc R . . 
C66 C 0.6850(4) 0.4901(4) 0.52788(18) 0.088(2) Uani 1 1 d . . . 
H66 H 0.6485 0.4976 0.5440 0.106 Uiso 1 1 calc R . . 
C67 C 0.5907(3) 0.4074(3) 0.60340(13) 0.0599(13) Uani 1 1 d . . . 
H67 H 0.5413 0.4069 0.5946 0.072 Uiso 1 1 calc R . . 
C68 C 0.6422(3) 0.3517(3) 0.59563(13) 0.0626(13) Uani 1 1 d . . . 
H68 H 0.6285 0.3132 0.5811 0.075 Uiso 1 1 calc R . . 
C69 C 0.7137(3) 0.3517(3) 0.60886(14) 0.0676(15) Uani 1 1 d . . . 
H69 H 0.7482 0.3119 0.6044 0.081 Uiso 1 1 calc R . . 
C70 C 0.7342(3) 0.4091(4) 0.62835(15) 0.0766(17) Uani 1 1 d . . . 
H70 H 0.7839 0.4101 0.6370 0.092 Uiso 1 1 calc R . . 
C71 C 0.6843(4) 0.4649(4) 0.63560(17) 0.0810(18) Uani 1 1 d . . . 
H71 H 0.6996 0.5054 0.6489 0.097 Uiso 1 1 calc R . . 
C72 C 0.6113(4) 0.4633(4) 0.62380(15) 0.0744(17) Uani 1 1 d . . . 
H72 H 0.5758 0.5009 0.6299 0.089 Uiso 1 1 calc R . . 
C73 C 0.0994(6) 0.5574(4) 0.6574(2) 0.116(3) Uani 1 1 d . . . 
H73 H 0.0512 0.5346 0.6604 0.139 Uiso 1 1 calc R . . 
C74 C 0.1540(6) 0.5547(5) 0.6809(3) 0.149(5) Uani 1 1 d . . . 
H74 H 0.1445 0.5230 0.6985 0.179 Uiso 1 1 calc R . . 
C75 C 0.2181(5) 0.5933(5) 0.6804(2) 0.105(3) Uani 1 1 d . . . 
H75 H 0.2526 0.5925 0.6975 0.126 Uiso 1 1 calc R . . 
C76 C 0.2329(5) 0.6371(7) 0.6522(2) 0.142(4) Uani 1 1 d . . . 
H76 H 0.2767 0.6681 0.6507 0.170 Uiso 1 1 calc R . . 
C77 C 0.1812(5) 0.6328(7) 0.6274(2) 0.131(4) Uani 1 1 d . . . 
H77 H 0.1933 0.6587 0.6085 0.157 Uiso 1 1 calc R . . 
C78 C 0.1172(5) 0.5953(5) 0.6285(2) 0.104(3) Uani 1 1 d . . . 
H78 H 0.0841 0.5933 0.6110 0.125 Uiso 1 1 calc R . . 
F1 F 0.7144(2) 0.4439(2) 0.75649(8) 0.0820(11) Uani 1 1 d . . . 
F2 F 0.7714(3) 0.4574(3) 0.71151(14) 0.146(2) Uani 1 1 d . . . 
F3 F 0.8124(3) 0.5249(3) 0.75111(11) 0.127(2) Uani 1 1 d . . . 
F4 F 0.7035(2) 0.5484(2) 0.72861(13) 0.1171(16) Uani 1 1 d . . . 
S1 S 1.05189(6) 0.13743(6) 0.71148(2) 0.0436(2) Uani 1 1 d . . . 
S2 S 0.00571(7) 0.37724(7) 0.70454(2) 0.0463(3) Uani 1 1 d . . . 
S3 S 0.37181(6) -0.28921(6) 0.27980(2) 0.0420(2) Uani 1 1 d . . . 
S4 S 0.60451(6) 0.76783(7) 0.26964(3) 0.0471(3) Uani 1 1 d . . . 
Si1 Si 0.53549(6) 0.24050(6) 0.49025(2) 0.0317(2) Uani 1 1 d . . . 
  
loop_ 
 _atom_site_aniso_label 
 _atom_site_aniso_U_11 
 _atom_site_aniso_U_22 
 _atom_site_aniso_U_33 
 _atom_site_aniso_U_23 
 _atom_site_aniso_U_13 
 _atom_site_aniso_U_12 
Ag1 0.0506(2) 0.0520(2) 0.02504(16) 0.00052(12) 0.00391(12) 0.00297(15) 
B1 0.048(3) 0.068(4) 0.049(3) 0.008(3) -0.010(2) -0.001(3) 
C1 0.0343(19) 0.039(2) 0.0280(17) -0.0010(15) -0.0006(14) 0.0012(16) 
C2 0.043(2) 0.047(2) 0.039(2) 0.0061(18) -0.0050(17) -0.0111(18) 
C3 0.049(2) 0.043(2) 0.038(2) 0.0115(17) -0.0039(18) -0.0034(18) 
C4 0.038(2) 0.045(2) 0.0335(19) 0.0024(16) -0.0044(16) 0.0007(17) 
C5 0.039(2) 0.059(3) 0.049(2) 0.015(2) -0.0102(19) -0.014(2) 
C6 0.043(2) 0.050(2) 0.041(2) 0.0137(18) -0.0049(18) -0.0064(19) 
C7 0.038(2) 0.049(2) 0.040(2) 0.0051(18) -0.0005(17) 0.0008(18) 
C8 0.044(2) 0.046(2) 0.038(2) 0.0050(18) -0.0008(18) 0.0005(18) 
C9 0.040(2) 0.043(2) 0.0344(19) 0.0005(16) -0.0036(16) 0.0028(17) 
C10 0.039(2) 0.062(3) 0.039(2) 0.0023(19) 0.0012(17) -0.001(2) 
C11 0.044(2) 0.062(3) 0.0315(19) -0.0010(19) 0.0023(17) -0.003(2) 
C12 0.041(2) 0.044(2) 0.0320(19) -0.0045(16) -0.0026(16) 0.0059(17) 
C13 0.035(2) 0.058(3) 0.035(2) 0.0004(18) 0.0010(16) 0.0046(18) 
C14 0.042(2) 0.050(2) 0.036(2) 0.0051(18) 0.0009(17) 0.0032(19) 
C15 0.077(4) 0.057(3) 0.062(3) 0.011(3) -0.003(3) 0.010(3) 
C16 0.0316(18) 0.050(2) 0.0246(16) -0.0025(16) -0.0006(14) -0.0020(17) 
C17 0.051(3) 0.068(3) 0.039(2) -0.012(2) 0.007(2) -0.014(2) 
C18 0.039(2) 0.093(4) 0.046(3) -0.014(3) 0.007(2) -0.020(2) 
C19 0.037(2) 0.078(3) 0.0264(18) -0.0082(19) 0.0055(16) -0.006(2) 
C20 0.044(2) 0.065(3) 0.035(2) -0.012(2) 0.0047(18) -0.002(2) 
C21 0.043(2) 0.056(3) 0.036(2) -0.0061(19) 0.0070(17) -0.0058(19) 
C22 0.039(2) 0.091(4) 0.031(2) -0.013(2) 0.0026(17) -0.009(2) 
C23 0.040(2) 0.084(3) 0.032(2) -0.016(2) 0.0014(17) -0.011(2) 
C24 0.037(2) 0.069(3) 0.0316(19) -0.0108(19) 0.0049(16) -0.008(2) 
C25 0.044(2) 0.058(3) 0.0257(18) -0.0012(17) -0.0015(16) 0.004(2) 
C26 0.039(2) 0.060(3) 0.033(2) 0.0051(18) -0.0013(17) 0.014(2) 
C27 0.039(2) 0.042(2) 0.0298(18) 0.0030(15) 0.0070(15) 0.0029(17) 
C28 0.040(2) 0.106(4) 0.0251(19) -0.010(2) -0.0009(17) -0.002(2) 
C29 0.031(2) 0.144(5) 0.030(2) -0.015(3) -0.0005(17) -0.001(3) 
C30 0.054(3) 0.097(4) 0.069(4) 0.018(3) 0.012(3) 0.018(3) 
C31 0.0340(18) 0.039(2) 0.0281(17) -0.0012(15) 0.0053(14) -0.0034(15) 
C32 0.044(2) 0.047(2) 0.035(2) 0.0003(17) -0.0010(17) 0.0030(18) 
C33 0.055(3) 0.038(2) 0.042(2) -0.0031(18) 0.0015(19) -0.0011(19) 
C34 0.045(2) 0.044(2) 0.0311(19) -0.0046(16) 0.0071(16) -0.0102(18) 
C35 0.0344(19) 0.055(2) 0.0288(18) -0.0020(17) 0.0043(15) -0.0081(18) 
C36 0.0344(19) 0.044(2) 0.0300(18) -0.0039(16) 0.0039(15) 0.0001(16) 
C37 0.055(3) 0.047(2) 0.034(2) -0.0014(18) 0.0048(18) -0.009(2) 
C38 0.057(3) 0.049(2) 0.035(2) -0.0033(18) 0.0050(19) -0.007(2) 
C39 0.053(2) 0.045(2) 0.033(2) -0.0037(17) 0.0060(18) -0.0080(19) 
C40 0.065(3) 0.056(3) 0.0265(19) -0.0034(18) -0.0019(19) 0.003(2) 
C41 0.055(3) 0.044(2) 0.036(2) 0.0004(17) 0.0027(19) -0.001(2) 
C42 0.035(2) 0.048(2) 0.0332(19) -0.0073(16) 0.0047(16) -0.0030(17) 
C43 0.060(3) 0.053(3) 0.037(2) 0.0004(19) -0.008(2) -0.001(2) 
C44 0.073(3) 0.044(2) 0.040(2) -0.0004(19) 0.000(2) -0.004(2) 
C45 0.053(3) 0.057(3) 0.062(3) -0.006(2) -0.004(2) -0.007(2) 
C46 0.0331(18) 0.039(2) 0.0254(16) 0.0001(14) 0.0006(14) 0.0012(15) 
C47 0.0329(19) 0.041(2) 0.0301(18) -0.0019(15) -0.0006(15) 0.0048(16) 
C48 0.037(2) 0.049(2) 0.0270(17) -0.0015(16) 0.0054(15) 0.0000(17) 
C49 0.040(2) 0.045(2) 0.0291(18) -0.0006(16) 0.0005(15) 0.0035(17) 
C50 0.049(2) 0.043(2) 0.036(2) 0.0027(17) 0.0073(18) 0.0143(18) 
C51 0.044(2) 0.046(2) 0.033(2) -0.0006(17) 0.0121(17) 0.0073(18) 
C52 0.043(2) 0.048(2) 0.0321(19) 0.0009(17) 0.0028(16) 0.0063(18) 
C53 0.041(2) 0.044(2) 0.036(2) -0.0014(17) 0.0054(16) 0.0050(18) 
C54 0.035(2) 0.050(2) 0.0329(19) 0.0035(17) -0.0023(16) -0.0011(17) 
C55 0.049(2) 0.042(2) 0.035(2) -0.0003(17) 0.0035(17) 0.0016(18) 
C56 0.048(2) 0.050(2) 0.0304(19) -0.0028(17) 0.0034(17) -0.0003(19) 
C57 0.0293(18) 0.047(2) 0.0341(19) 0.0047(16) -0.0048(15) -0.0044(16) 
C58 0.041(2) 0.041(2) 0.045(2) -0.0020(18) 0.0004(18) 0.0018(18) 
C59 0.047(2) 0.053(3) 0.0317(19) -0.0033(17) -0.0003(17) 0.0036(19) 
C60 0.046(3) 0.111(5) 0.086(4) 0.037(4) 0.018(3) 0.009(3) 
C61 0.065(4) 0.106(6) 0.101(5) 0.005(4) -0.009(4) 0.019(4) 
C62 0.078(4) 0.085(4) 0.070(4) -0.012(3) -0.022(3) 0.017(3) 
C63 0.056(3) 0.063(3) 0.071(3) -0.008(3) 0.000(3) 0.001(3) 
C64 0.059(3) 0.068(3) 0.070(3) -0.005(3) -0.013(3) 0.008(3) 
C65 0.076(4) 0.062(3) 0.071(4) 0.003(3) 0.001(3) 0.007(3) 
C66 0.075(4) 0.102(5) 0.087(5) 0.014(4) 0.018(4) 0.016(4) 
C67 0.056(3) 0.057(3) 0.067(3) 0.008(3) -0.008(2) -0.001(2) 
C68 0.060(3) 0.066(3) 0.062(3) 0.002(3) 0.008(3) -0.001(3) 
C69 0.053(3) 0.069(3) 0.081(4) -0.013(3) 0.008(3) 0.003(3) 
C70 0.054(3) 0.093(5) 0.083(4) -0.008(3) -0.001(3) 0.012(3) 
C71 0.072(4) 0.073(4) 0.098(5) -0.017(4) -0.015(4) 0.008(3) 
C72 0.071(4) 0.068(4) 0.084(4) -0.011(3) -0.011(3) 0.017(3) 
C73 0.124(7) 0.076(5) 0.148(8) 0.020(5) -0.038(6) -0.020(5) 
C74 0.169(9) 0.084(6) 0.196(11) 0.051(6) -0.103(9) -0.050(6) 
C75 0.093(5) 0.124(7) 0.098(6) -0.029(5) -0.010(5) 0.015(5) 
C76 0.061(5) 0.252(13) 0.112(7) -0.063(8) 0.032(5) -0.017(6) 
C77 0.072(5) 0.224(12) 0.096(6) -0.022(7) 0.024(5) 0.019(6) 
C78 0.103(6) 0.093(6) 0.118(7) -0.019(5) -0.022(5) 0.000(5) 
F1 0.081(2) 0.098(3) 0.066(2) 0.0137(18) -0.0107(17) -0.036(2) 
F2 0.139(4) 0.136(4) 0.161(5) -0.046(4) 0.086(4) -0.043(3) 
F3 0.100(3) 0.145(4) 0.137(4) 0.090(3) -0.074(3) -0.072(3) 
F4 0.087(3) 0.086(3) 0.178(4) 0.038(3) -0.040(3) 0.017(2) 
S1 0.0465(6) 0.0511(6) 0.0333(5) -0.0024(4) -0.0053(4) 0.0078(5) 
S2 0.0505(6) 0.0554(7) 0.0329(5) 0.0066(4) 0.0122(4) 0.0130(5) 
S3 0.0396(5) 0.0485(6) 0.0379(5) -0.0085(4) -0.0024(4) -0.0032(4) 
S4 0.0400(6) 0.0547(7) 0.0467(6) 0.0145(5) -0.0052(5) -0.0039(5) 
Si1 0.0304(5) 0.0390(6) 0.0256(5) -0.0019(4) 0.0016(4) -0.0016(4) 
  
_geom_special_details 
; 
 All esds (except the esd in the dihedral angle between two l.s. planes) 
 are estimated using the full covariance matrix.  The cell esds are taken 
 into account individually in the estimation of esds in distances, angles 
 and torsion angles; correlations between esds in cell parameters are only 
 used when they are defined by crystal symmetry.  An approximate (isotropic) 
 treatment of cell esds is used for estimating esds involving l.s. planes. 
; 
  
loop_ 
 _geom_bond_atom_site_label_1 
 _geom_bond_atom_site_label_2 
 _geom_bond_distance 
 _geom_bond_site_symmetry_2 
 _geom_bond_publ_flag 
Ag1 S4 2.5671(12) 2_665 ? 
Ag1 S2 2.5725(12) 1_655 ? 
Ag1 S3 2.5769(11) 2_655 ? 
Ag1 S1 2.5922(12) . ? 
B1 F4 1.305(7) . ? 
B1 F2 1.343(8) . ? 
B1 F3 1.352(7) . ? 
B1 F1 1.371(7) . ? 
C1 C6 1.391(6) . ? 
C1 C2 1.393(6) . ? 
C1 Si1 1.874(4) . ? 
C2 C3 1.376(6) . ? 
C2 H2 0.9500 . ? 
C3 C4 1.388(6) . ? 
C3 H3 0.9500 . ? 
C4 C5 1.392(6) . ? 
C4 C7 1.439(6) . ? 
C5 C6 1.402(6) . ? 
C5 H5 0.9500 . ? 
C6 H6 0.9500 . ? 
C7 C8 1.190(6) . ? 
C8 C9 1.438(6) . ? 
C9 C14 1.390(6) . ? 
C9 C10 1.405(6) . ? 
C10 C11 1.382(6) . ? 
C10 H10 0.9500 . ? 
C11 C12 1.380(6) . ? 
C11 H11 0.9500 . ? 
C12 C13 1.381(6) . ? 
C12 S1 1.778(4) . ? 
C13 C14 1.385(6) . ? 
C13 H13 0.9500 . ? 
C14 H14 0.9500 . ? 
C15 S1 1.807(6) . ? 
C15 H15A 0.9800 . ? 
C15 H15B 0.9800 . ? 
C15 H15C 0.9800 . ? 
C16 C21 1.381(6) . ? 
C16 C17 1.401(6) . ? 
C16 Si1 1.870(4) . ? 
C17 C18 1.384(6) . ? 
C17 H17 0.9500 . ? 
C18 C19 1.388(7) . ? 
C18 H18 0.9500 . ? 
C19 C20 1.391(6) . ? 
C19 C22 1.441(6) . ? 
C20 C21 1.386(6) . ? 
C20 H20 0.9500 . ? 
C21 H21 0.9500 . ? 
C22 C23 1.188(6) . ? 
C23 C24 1.447(6) . ? 
C24 C25 1.375(6) . ? 
C24 C29 1.398(6) . ? 
C25 C26 1.385(6) . ? 
C25 H25 0.9500 . ? 
C26 C27 1.385(5) . ? 
C26 H26 0.9500 . ? 
C27 C28 1.370(6) . ? 
C27 S2 1.774(4) . ? 
C28 C29 1.384(6) . ? 
C28 H28 0.9500 . ? 
C29 H29 0.9500 . ? 
C30 S2 1.770(6) . ? 
C30 H30A 0.9800 . ? 
C30 H30B 0.9800 . ? 
C30 H30C 0.9800 . ? 
C31 C36 1.396(5) . ? 
C31 C32 1.406(6) . ? 
C31 Si1 1.881(4) . ? 
C32 C33 1.390(6) . ? 
C32 H32 0.9500 . ? 
C33 C34 1.388(6) . ? 
C33 H33 0.9500 . ? 
C34 C35 1.395(6) . ? 
C34 C37 1.444(6) . ? 
C35 C36 1.387(5) . ? 
C35 H35 0.9500 . ? 
C36 H36 0.9500 . ? 
C37 C38 1.198(6) . ? 
C38 C39 1.437(6) . ? 
C39 C44 1.386(6) . ? 
C39 C40 1.386(6) . ? 
C40 C41 1.398(6) . ? 
C40 H40 0.9500 . ? 
C41 C42 1.373(6) . ? 
C41 H41 0.9500 . ? 
C42 C43 1.385(6) . ? 
C42 S3 1.777(4) . ? 
C43 C44 1.393(6) . ? 
C43 H43 0.9500 . ? 
C44 H44 0.9500 . ? 
C45 S3 1.801(5) . ? 
C45 H45A 0.9800 . ? 
C45 H45B 0.9800 . ? 
C45 H45C 0.9800 . ? 
C46 C47 1.397(5) . ? 
C46 C51 1.399(6) . ? 
C46 Si1 1.875(4) . ? 
C47 C48 1.375(5) . ? 
C47 H47 0.9500 . ? 
C48 C49 1.396(6) . ? 
C48 H48 0.9500 . ? 
C49 C50 1.402(6) . ? 
C49 C52 1.440(6) . ? 
C50 C51 1.378(6) . ? 
C50 H50 0.9500 . ? 
C51 H51 0.9500 . ? 
C52 C53 1.195(6) . ? 
C53 C54 1.434(6) . ? 
C54 C55 1.395(6) . ? 
C54 C59 1.415(6) . ? 
C55 C56 1.383(6) . ? 
C55 H55 0.9500 . ? 
C56 C57 1.393(6) . ? 
C56 H56 0.9500 . ? 
C57 C58 1.385(6) . ? 
C57 S4 1.772(4) . ? 
C58 C59 1.375(6) . ? 
C58 H58 0.9500 . ? 
C59 H59 0.9500 . ? 
C60 S4 1.801(6) . ? 
C60 H60A 0.9800 . ? 
C60 H60B 0.9800 . ? 
C60 H60C 0.9800 . ? 
C61 C66 1.353(10) . ? 
C61 C62 1.382(10) . ? 
C61 H61 0.9500 . ? 
C62 C63 1.339(8) . ? 
C62 H62 0.9500 . ? 
C63 C64 1.373(8) . ? 
C63 H63 0.9500 . ? 
C64 C65 1.338(8) . ? 
C64 H64 0.9500 . ? 
C65 C66 1.373(9) . ? 
C65 H65 0.9500 . ? 
C66 H66 0.9500 . ? 
C67 C72 1.364(8) . ? 
C67 C68 1.380(8) . ? 
C67 H67 0.9500 . ? 
C68 C69 1.382(8) . ? 
C68 H68 0.9500 . ? 
C69 C70 1.358(9) . ? 
C69 H69 0.9500 . ? 
C70 C71 1.358(9) . ? 
C70 H70 0.9500 . ? 
C71 C72 1.384(9) . ? 
C71 H71 0.9500 . ? 
C72 H72 0.9500 . ? 
C73 C74 1.392(12) . ? 
C73 C78 1.437(12) . ? 
C73 H73 0.9500 . ? 
C74 C75 1.322(12) . ? 
C74 H74 0.9500 . ? 
C75 C76 1.451(14) . ? 
C75 H75 0.9500 . ? 
C76 C77 1.401(12) . ? 
C76 H76 0.9500 . ? 
C77 C78 1.310(12) . ? 
C77 H77 0.9500 . ? 
C78 H78 0.9500 . ? 
S2 Ag1 2.5725(12) 1_455 ? 
S3 Ag1 2.5770(11) 2_654 ? 
S4 Ag1 2.5671(12) 2_664 ? 
  
loop_ 
 _geom_angle_atom_site_label_1 
 _geom_angle_atom_site_label_2 
 _geom_angle_atom_site_label_3 
 _geom_angle 
 _geom_angle_site_symmetry_1 
 _geom_angle_site_symmetry_3 
 _geom_angle_publ_flag 
S4 Ag1 S2 111.49(4) 2_665 1_655 ? 
S4 Ag1 S3 111.54(4) 2_665 2_655 ? 
S2 Ag1 S3 108.13(4) 1_655 2_655 ? 
S4 Ag1 S1 104.19(4) 2_665 . ? 
S2 Ag1 S1 113.54(4) 1_655 . ? 
S3 Ag1 S1 107.93(4) 2_655 . ? 
F4 B1 F2 107.4(6) . . ? 
F4 B1 F3 111.0(6) . . ? 
F2 B1 F3 108.6(6) . . ? 
F4 B1 F1 110.8(5) . . ? 
F2 B1 F1 106.8(5) . . ? 
F3 B1 F1 111.9(4) . . ? 
C6 C1 C2 117.9(4) . . ? 
C6 C1 Si1 121.7(3) . . ? 
C2 C1 Si1 119.8(3) . . ? 
C3 C2 C1 121.4(4) . . ? 
C3 C2 H2 119.3 . . ? 
C1 C2 H2 119.3 . . ? 
C2 C3 C4 121.1(4) . . ? 
C2 C3 H3 119.4 . . ? 
C4 C3 H3 119.4 . . ? 
C3 C4 C5 118.3(4) . . ? 
C3 C4 C7 120.5(4) . . ? 
C5 C4 C7 121.1(4) . . ? 
C4 C5 C6 120.5(4) . . ? 
C4 C5 H5 119.7 . . ? 
C6 C5 H5 119.7 . . ? 
C1 C6 C5 120.7(4) . . ? 
C1 C6 H6 119.6 . . ? 
C5 C6 H6 119.6 . . ? 
C8 C7 C4 174.2(5) . . ? 
C7 C8 C9 178.7(5) . . ? 
C14 C9 C10 118.7(4) . . ? 
C14 C9 C8 121.5(4) . . ? 
C10 C9 C8 119.8(4) . . ? 
C11 C10 C9 120.2(4) . . ? 
C11 C10 H10 119.9 . . ? 
C9 C10 H10 119.9 . . ? 
C12 C11 C10 120.5(4) . . ? 
C12 C11 H11 119.7 . . ? 
C10 C11 H11 119.7 . . ? 
C11 C12 C13 119.6(4) . . ? 
C11 C12 S1 122.8(3) . . ? 
C13 C12 S1 117.6(3) . . ? 
C12 C13 C14 120.6(4) . . ? 
C12 C13 H13 119.7 . . ? 
C14 C13 H13 119.7 . . ? 
C13 C14 C9 120.3(4) . . ? 
C13 C14 H14 119.8 . . ? 
C9 C14 H14 119.8 . . ? 
S1 C15 H15A 109.5 . . ? 
S1 C15 H15B 109.5 . . ? 
H15A C15 H15B 109.5 . . ? 
S1 C15 H15C 109.5 . . ? 
H15A C15 H15C 109.5 . . ? 
H15B C15 H15C 109.5 . . ? 
C21 C16 C17 117.3(4) . . ? 
C21 C16 Si1 121.6(3) . . ? 
C17 C16 Si1 121.0(3) . . ? 
C18 C17 C16 121.4(4) . . ? 
C18 C17 H17 119.3 . . ? 
C16 C17 H17 119.3 . . ? 
C17 C18 C19 120.5(4) . . ? 
C17 C18 H18 119.7 . . ? 
C19 C18 H18 119.7 . . ? 
C18 C19 C20 118.6(4) . . ? 
C18 C19 C22 120.7(4) . . ? 
C20 C19 C22 120.6(4) . . ? 
C21 C20 C19 120.3(4) . . ? 
C21 C20 H20 119.8 . . ? 
C19 C20 H20 119.8 . . ? 
C16 C21 C20 121.9(4) . . ? 
C16 C21 H21 119.1 . . ? 
C20 C21 H21 119.1 . . ? 
C23 C22 C19 178.0(6) . . ? 
C22 C23 C24 178.2(6) . . ? 
C25 C24 C29 118.9(4) . . ? 
C25 C24 C23 121.1(4) . . ? 
C29 C24 C23 120.0(4) . . ? 
C24 C25 C26 120.4(4) . . ? 
C24 C25 H25 119.8 . . ? 
C26 C25 H25 119.8 . . ? 
C27 C26 C25 120.3(4) . . ? 
C27 C26 H26 119.8 . . ? 
C25 C26 H26 119.8 . . ? 
C28 C27 C26 119.7(4) . . ? 
C28 C27 S2 118.4(3) . . ? 
C26 C27 S2 121.9(3) . . ? 
C27 C28 C29 120.3(4) . . ? 
C27 C28 H28 119.9 . . ? 
C29 C28 H28 119.9 . . ? 
C28 C29 C24 120.4(4) . . ? 
C28 C29 H29 119.8 . . ? 
C24 C29 H29 119.8 . . ? 
S2 C30 H30A 109.5 . . ? 
S2 C30 H30B 109.5 . . ? 
H30A C30 H30B 109.5 . . ? 
S2 C30 H30C 109.5 . . ? 
H30A C30 H30C 109.5 . . ? 
H30B C30 H30C 109.5 . . ? 
C36 C31 C32 117.4(4) . . ? 
C36 C31 Si1 116.8(3) . . ? 
C32 C31 Si1 125.7(3) . . ? 
C33 C32 C31 120.9(4) . . ? 
C33 C32 H32 119.6 . . ? 
C31 C32 H32 119.6 . . ? 
C34 C33 C32 120.7(4) . . ? 
C34 C33 H33 119.7 . . ? 
C32 C33 H33 119.7 . . ? 
C33 C34 C35 119.3(4) . . ? 
C33 C34 C37 121.0(4) . . ? 
C35 C34 C37 119.7(4) . . ? 
C36 C35 C34 119.8(4) . . ? 
C36 C35 H35 120.1 . . ? 
C34 C35 H35 120.1 . . ? 
C35 C36 C31 122.0(4) . . ? 
C35 C36 H36 119.0 . . ? 
C31 C36 H36 119.0 . . ? 
C38 C37 C34 178.2(5) . . ? 
C37 C38 C39 175.7(5) . . ? 
C44 C39 C40 118.5(4) . . ? 
C44 C39 C38 121.9(4) . . ? 
C40 C39 C38 119.6(4) . . ? 
C39 C40 C41 121.2(4) . . ? 
C39 C40 H40 119.4 . . ? 
C41 C40 H40 119.4 . . ? 
C42 C41 C40 119.2(4) . . ? 
C42 C41 H41 120.4 . . ? 
C40 C41 H41 120.4 . . ? 
C41 C42 C43 120.4(4) . . ? 
C41 C42 S3 122.5(3) . . ? 
C43 C42 S3 117.0(3) . . ? 
C42 C43 C44 119.7(4) . . ? 
C42 C43 H43 120.2 . . ? 
C44 C43 H43 120.2 . . ? 
C39 C44 C43 120.7(4) . . ? 
C39 C44 H44 119.7 . . ? 
C43 C44 H44 119.7 . . ? 
S3 C45 H45A 109.5 . . ? 
S3 C45 H45B 109.5 . . ? 
H45A C45 H45B 109.5 . . ? 
S3 C45 H45C 109.5 . . ? 
H45A C45 H45C 109.5 . . ? 
H45B C45 H45C 109.5 . . ? 
C47 C46 C51 117.1(3) . . ? 
C47 C46 Si1 119.4(3) . . ? 
C51 C46 Si1 123.1(3) . . ? 
C48 C47 C46 122.2(4) . . ? 
C48 C47 H47 118.9 . . ? 
C46 C47 H47 118.9 . . ? 
C47 C48 C49 120.1(4) . . ? 
C47 C48 H48 119.9 . . ? 
C49 C48 H48 119.9 . . ? 
C48 C49 C50 118.7(4) . . ? 
C48 C49 C52 121.4(4) . . ? 
C50 C49 C52 119.9(4) . . ? 
C51 C50 C49 120.2(4) . . ? 
C51 C50 H50 119.9 . . ? 
C49 C50 H50 119.9 . . ? 
C50 C51 C46 121.7(4) . . ? 
C50 C51 H51 119.2 . . ? 
C46 C51 H51 119.2 . . ? 
C53 C52 C49 177.0(5) . . ? 
C52 C53 C54 177.6(5) . . ? 
C55 C54 C59 118.6(4) . . ? 
C55 C54 C53 121.3(4) . . ? 
C59 C54 C53 120.1(4) . . ? 
C56 C55 C54 120.4(4) . . ? 
C56 C55 H55 119.8 . . ? 
C54 C55 H55 119.8 . . ? 
C55 C56 C57 120.4(4) . . ? 
C55 C56 H56 119.8 . . ? 
C57 C56 H56 119.8 . . ? 
C58 C57 C56 119.7(4) . . ? 
C58 C57 S4 117.8(3) . . ? 
C56 C57 S4 122.5(3) . . ? 
C59 C58 C57 120.5(4) . . ? 
C59 C58 H58 119.7 . . ? 
C57 C58 H58 119.7 . . ? 
C58 C59 C54 120.4(4) . . ? 
C58 C59 H59 119.8 . . ? 
C54 C59 H59 119.8 . . ? 
S4 C60 H60A 109.5 . . ? 
S4 C60 H60B 109.5 . . ? 
H60A C60 H60B 109.5 . . ? 
S4 C60 H60C 109.5 . . ? 
H60A C60 H60C 109.5 . . ? 
H60B C60 H60C 109.5 . . ? 
C66 C61 C62 120.6(6) . . ? 
C66 C61 H61 119.7 . . ? 
C62 C61 H61 119.7 . . ? 
C63 C62 C61 118.8(6) . . ? 
C63 C62 H62 120.6 . . ? 
C61 C62 H62 120.6 . . ? 
C62 C63 C64 120.2(6) . . ? 
C62 C63 H63 119.9 . . ? 
C64 C63 H63 119.9 . . ? 
C65 C64 C63 121.3(6) . . ? 
C65 C64 H64 119.3 . . ? 
C63 C64 H64 119.3 . . ? 
C64 C65 C66 119.0(6) . . ? 
C64 C65 H65 120.5 . . ? 
C66 C65 H65 120.5 . . ? 
C61 C66 C65 119.9(7) . . ? 
C61 C66 H66 120.0 . . ? 
C65 C66 H66 120.0 . . ? 
C72 C67 C68 119.5(5) . . ? 
C72 C67 H67 120.3 . . ? 
C68 C67 H67 120.3 . . ? 
C67 C68 C69 120.2(5) . . ? 
C67 C68 H68 119.9 . . ? 
C69 C68 H68 119.9 . . ? 
C70 C69 C68 119.6(6) . . ? 
C70 C69 H69 120.2 . . ? 
C68 C69 H69 120.2 . . ? 
C71 C70 C69 120.4(6) . . ? 
C71 C70 H70 119.8 . . ? 
C69 C70 H70 119.8 . . ? 
C70 C71 C72 120.5(6) . . ? 
C70 C71 H71 119.8 . . ? 
C72 C71 H71 119.8 . . ? 
C67 C72 C71 119.7(6) . . ? 
C67 C72 H72 120.2 . . ? 
C71 C72 H72 120.2 . . ? 
C74 C73 C78 118.8(9) . . ? 
C74 C73 H73 120.6 . . ? 
C78 C73 H73 120.6 . . ? 
C75 C74 C73 124.3(10) . . ? 
C75 C74 H74 117.9 . . ? 
C73 C74 H74 117.9 . . ? 
C74 C75 C76 116.3(8) . . ? 
C74 C75 H75 121.8 . . ? 
C76 C75 H75 121.8 . . ? 
C77 C76 C75 118.7(9) . . ? 
C77 C76 H76 120.7 . . ? 
C75 C76 H76 120.7 . . ? 
C78 C77 C76 124.1(10) . . ? 
C78 C77 H77 117.9 . . ? 
C76 C77 H77 117.9 . . ? 
C77 C78 C73 117.1(9) . . ? 
C77 C78 H78 121.4 . . ? 
C73 C78 H78 121.4 . . ? 
C12 S1 C15 104.2(2) . . ? 
C12 S1 Ag1 97.31(14) . . ? 
C15 S1 Ag1 104.2(2) . . ? 
C30 S2 C27 104.0(2) . . ? 
C30 S2 Ag1 106.5(2) . 1_455 ? 
C27 S2 Ag1 104.65(14) . 1_455 ? 
C42 S3 C45 105.1(2) . . ? 
C42 S3 Ag1 105.22(14) . 2_654 ? 
C45 S3 Ag1 103.12(18) . 2_654 ? 
C57 S4 C60 103.6(2) . . ? 
C57 S4 Ag1 101.09(13) . 2_664 ? 
C60 S4 Ag1 116.8(3) . 2_664 ? 
C16 Si1 C1 107.29(17) . . ? 
C16 Si1 C46 111.24(18) . . ? 
C1 Si1 C46 110.95(17) . . ? 
C16 Si1 C31 108.83(17) . . ? 
C1 Si1 C31 113.33(18) . . ? 
C46 Si1 C31 105.24(17) . . ? 
  
loop_ 
 _geom_torsion_atom_site_label_1 
 _geom_torsion_atom_site_label_2 
 _geom_torsion_atom_site_label_3 
 _geom_torsion_atom_site_label_4 
 _geom_torsion 
 _geom_torsion_site_symmetry_1 
 _geom_torsion_site_symmetry_2 
 _geom_torsion_site_symmetry_3 
 _geom_torsion_site_symmetry_4 
 _geom_torsion_publ_flag 
C6 C1 C2 C3 -1.1(6) . . . . ? 
Si1 C1 C2 C3 -172.5(3) . . . . ? 
C1 C2 C3 C4 1.0(7) . . . . ? 
C2 C3 C4 C5 -0.8(7) . . . . ? 
C2 C3 C4 C7 174.5(4) . . . . ? 
C3 C4 C5 C6 0.7(7) . . . . ? 
C7 C4 C5 C6 -174.6(4) . . . . ? 
C2 C1 C6 C5 0.9(7) . . . . ? 
Si1 C1 C6 C5 172.2(4) . . . . ? 
C4 C5 C6 C1 -0.7(7) . . . . ? 
C14 C9 C10 C11 -1.3(7) . . . . ? 
C8 C9 C10 C11 177.0(4) . . . . ? 
C9 C10 C11 C12 0.2(7) . . . . ? 
C10 C11 C12 C13 0.6(7) . . . . ? 
C10 C11 C12 S1 179.4(4) . . . . ? 
C11 C12 C13 C14 -0.3(7) . . . . ? 
S1 C12 C13 C14 -179.2(4) . . . . ? 
C12 C13 C14 C9 -0.8(7) . . . . ? 
C10 C9 C14 C13 1.6(7) . . . . ? 
C8 C9 C14 C13 -176.7(4) . . . . ? 
C21 C16 C17 C18 1.0(7) . . . . ? 
Si1 C16 C17 C18 177.1(4) . . . . ? 
C16 C17 C18 C19 0.3(8) . . . . ? 
C17 C18 C19 C20 -1.3(8) . . . . ? 
C17 C18 C19 C22 -178.7(5) . . . . ? 
C18 C19 C20 C21 1.0(7) . . . . ? 
C22 C19 C20 C21 178.4(4) . . . . ? 
C17 C16 C21 C20 -1.3(7) . . . . ? 
Si1 C16 C21 C20 -177.3(4) . . . . ? 
C19 C20 C21 C16 0.3(7) . . . . ? 
C29 C24 C25 C26 -0.1(8) . . . . ? 
C23 C24 C25 C26 178.8(5) . . . . ? 
C24 C25 C26 C27 0.5(7) . . . . ? 
C25 C26 C27 C28 -0.8(7) . . . . ? 
C25 C26 C27 S2 178.0(4) . . . . ? 
C26 C27 C28 C29 0.7(8) . . . . ? 
S2 C27 C28 C29 -178.2(5) . . . . ? 
C27 C28 C29 C24 -0.2(9) . . . . ? 
C25 C24 C29 C28 -0.1(9) . . . . ? 
C23 C24 C29 C28 -178.9(6) . . . . ? 
C36 C31 C32 C33 1.2(6) . . . . ? 
Si1 C31 C32 C33 -175.8(3) . . . . ? 
C31 C32 C33 C34 0.1(6) . . . . ? 
C32 C33 C34 C35 -1.7(6) . . . . ? 
C32 C33 C34 C37 176.3(4) . . . . ? 
C33 C34 C35 C36 2.0(6) . . . . ? 
C37 C34 C35 C36 -176.0(4) . . . . ? 
C34 C35 C36 C31 -0.7(6) . . . . ? 
C32 C31 C36 C35 -0.9(6) . . . . ? 
Si1 C31 C36 C35 176.4(3) . . . . ? 
C44 C39 C40 C41 4.0(7) . . . . ? 
C38 C39 C40 C41 -175.7(4) . . . . ? 
C39 C40 C41 C42 0.4(7) . . . . ? 
C40 C41 C42 C43 -4.7(7) . . . . ? 
C40 C41 C42 S3 178.5(4) . . . . ? 
C41 C42 C43 C44 4.5(7) . . . . ? 
S3 C42 C43 C44 -178.6(4) . . . . ? 
C40 C39 C44 C43 -4.2(7) . . . . ? 
C38 C39 C44 C43 175.4(5) . . . . ? 
C42 C43 C44 C39 0.0(8) . . . . ? 
C51 C46 C47 C48 0.5(6) . . . . ? 
Si1 C46 C47 C48 173.3(3) . . . . ? 
C46 C47 C48 C49 -0.3(6) . . . . ? 
C47 C48 C49 C50 0.4(6) . . . . ? 
C47 C48 C49 C52 -177.7(4) . . . . ? 
C48 C49 C50 C51 -0.7(6) . . . . ? 
C52 C49 C50 C51 177.4(4) . . . . ? 
C49 C50 C51 C46 1.0(7) . . . . ? 
C47 C46 C51 C50 -0.8(6) . . . . ? 
Si1 C46 C51 C50 -173.3(3) . . . . ? 
C59 C54 C55 C56 -1.3(6) . . . . ? 
C53 C54 C55 C56 178.6(4) . . . . ? 
C54 C55 C56 C57 0.7(7) . . . . ? 
C55 C56 C57 C58 1.0(6) . . . . ? 
C55 C56 C57 S4 -178.6(3) . . . . ? 
C56 C57 C58 C59 -2.0(6) . . . . ? 
S4 C57 C58 C59 177.6(3) . . . . ? 
C57 C58 C59 C54 1.4(7) . . . . ? 
C55 C54 C59 C58 0.3(6) . . . . ? 
C53 C54 C59 C58 -179.6(4) . . . . ? 
C66 C61 C62 C63 4.9(12) . . . . ? 
C61 C62 C63 C64 -3.9(10) . . . . ? 
C62 C63 C64 C65 2.5(9) . . . . ? 
C63 C64 C65 C66 -1.8(10) . . . . ? 
C62 C61 C66 C65 -4.3(12) . . . . ? 
C64 C65 C66 C61 2.7(11) . . . . ? 
C72 C67 C68 C69 1.2(9) . . . . ? 
C67 C68 C69 C70 -3.3(9) . . . . ? 
C68 C69 C70 C71 2.0(10) . . . . ? 
C69 C70 C71 C72 1.4(11) . . . . ? 
C68 C67 C72 C71 2.2(9) . . . . ? 
C70 C71 C72 C67 -3.5(11) . . . . ? 
C78 C73 C74 C75 9.5(17) . . . . ? 
C73 C74 C75 C76 -4.0(17) . . . . ? 
C74 C75 C76 C77 -3.0(14) . . . . ? 
C75 C76 C77 C78 4.6(16) . . . . ? 
C76 C77 C78 C73 0.8(16) . . . . ? 
C74 C73 C78 C77 -7.6(14) . . . . ? 
C11 C12 S1 C15 29.9(5) . . . . ? 
C13 C12 S1 C15 -151.2(4) . . . . ? 
C11 C12 S1 Ag1 -76.7(4) . . . . ? 
C13 C12 S1 Ag1 102.1(3) . . . . ? 
S4 Ag1 S1 C12 77.77(15) 2_665 . . . ? 
S2 Ag1 S1 C12 -43.71(15) 1_655 . . . ? 
S3 Ag1 S1 C12 -163.55(15) 2_655 . . . ? 
S4 Ag1 S1 C15 -28.9(2) 2_665 . . . ? 
S2 Ag1 S1 C15 -150.4(2) 1_655 . . . ? 
S3 Ag1 S1 C15 89.7(2) 2_655 . . . ? 
C28 C27 S2 C30 -168.2(4) . . . . ? 
C26 C27 S2 C30 13.0(5) . . . . ? 
C28 C27 S2 Ag1 -56.6(4) . . . 1_455 ? 
C26 C27 S2 Ag1 124.6(4) . . . 1_455 ? 
C41 C42 S3 C45 -1.3(4) . . . . ? 
C43 C42 S3 C45 -178.2(4) . . . . ? 
C41 C42 S3 Ag1 -109.8(4) . . . 2_654 ? 
C43 C42 S3 Ag1 73.4(4) . . . 2_654 ? 
C58 C57 S4 C60 134.9(4) . . . . ? 
C56 C57 S4 C60 -45.5(4) . . . . ? 
C58 C57 S4 Ag1 -103.8(3) . . . 2_664 ? 
C56 C57 S4 Ag1 75.8(3) . . . 2_664 ? 
C21 C16 Si1 C1 65.7(4) . . . . ? 
C17 C16 Si1 C1 -110.1(4) . . . . ? 
C21 C16 Si1 C46 -55.8(4) . . . . ? 
C17 C16 Si1 C46 128.3(4) . . . . ? 
C21 C16 Si1 C31 -171.3(4) . . . . ? 
C17 C16 Si1 C31 12.8(4) . . . . ? 
C6 C1 Si1 C16 -111.7(4) . . . . ? 
C2 C1 Si1 C16 59.4(4) . . . . ? 
C6 C1 Si1 C46 10.0(4) . . . . ? 
C2 C1 Si1 C46 -178.9(3) . . . . ? 
C6 C1 Si1 C31 128.1(4) . . . . ? 
C2 C1 Si1 C31 -60.8(4) . . . . ? 
C47 C46 Si1 C16 177.2(3) . . . . ? 
C51 C46 Si1 C16 -10.5(4) . . . . ? 
C47 C46 Si1 C1 57.8(3) . . . . ? 
C51 C46 Si1 C1 -129.9(3) . . . . ? 
C47 C46 Si1 C31 -65.1(3) . . . . ? 
C51 C46 Si1 C31 107.2(4) . . . . ? 
C36 C31 Si1 C16 69.1(3) . . . . ? 
C32 C31 Si1 C16 -113.9(4) . . . . ? 
C36 C31 Si1 C1 -171.7(3) . . . . ? 
C32 C31 Si1 C1 5.4(4) . . . . ? 
C36 C31 Si1 C46 -50.3(3) . . . . ? 
C32 C31 Si1 C46 126.8(3) . . . . ? 
  
_diffrn_measured_fraction_theta_max    1.000 
_diffrn_reflns_theta_full              28.28 
_diffrn_measured_fraction_theta_full   1.000 
_refine_diff_density_max    2.433 
_refine_diff_density_min   -0.856 
_refine_diff_density_rms    0.177 
